# Supplementary material for: Granulosa cell metabolism at ovulation correlates with oocyte competence and is disrupted by obesity and aging
Source: PubMed Central journal article supplement — Hum Reprod. 2024 Jul 16;39(9):2053–66. doi: 10.1093/humrep/deae154 (PMC11373349; doi:10.1093/humrep/deae154), 2024-07-16
Supplement: deae154_supplementary_figure_s4.pdf [file deae154_supplementary_figure_s4.pdf]

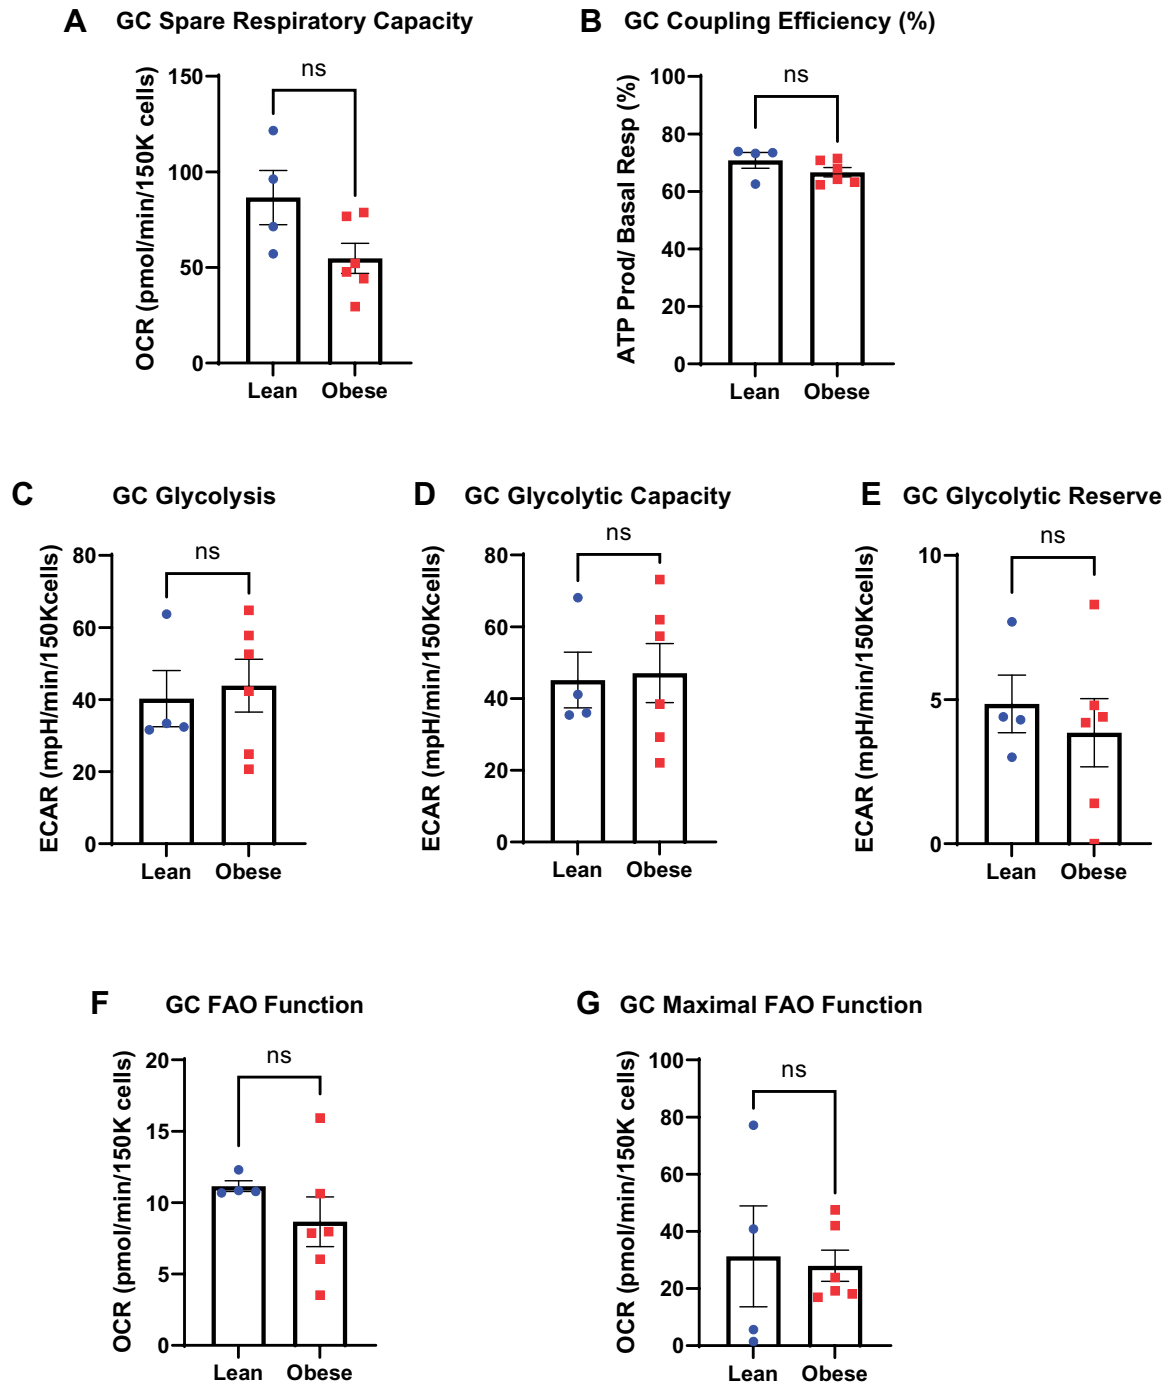

**Supplementary Figure S4.** No effects of obesity on aspects of mitochondrial respiration, glycolytic function, and fatty acid metabolism in mouse granulosa cells (GCs) at ovulation. GCs from lean or obese mice at 8-h post-hCG were analyzed for (A) spare respiration capacity; (B) coupling efficiency (%); (C) glycolysis; (D) glycolytic capacity; (E) glycolytic reserve; (F) fatty acid oxidation (FAO) function; (G) maximal FAO function. Data analyzed using unpaired two-tailed t-test. ns, non-significant;  $P > 0.05$ .
