# Supplementary material for: Granulosa cell metabolism at ovulation correlates with oocyte competence and is disrupted by obesity and aging
Source: PubMed Central journal article supplement — Hum Reprod. 2024 Jul 16;39(9):2053–66. doi: 10.1093/humrep/deae154 (PMC11373349; doi:10.1093/humrep/deae154), 2024-07-16
Supplement: deae154_supplementary_figure_s5.pdf [file deae154_supplementary_figure_s5.pdf]

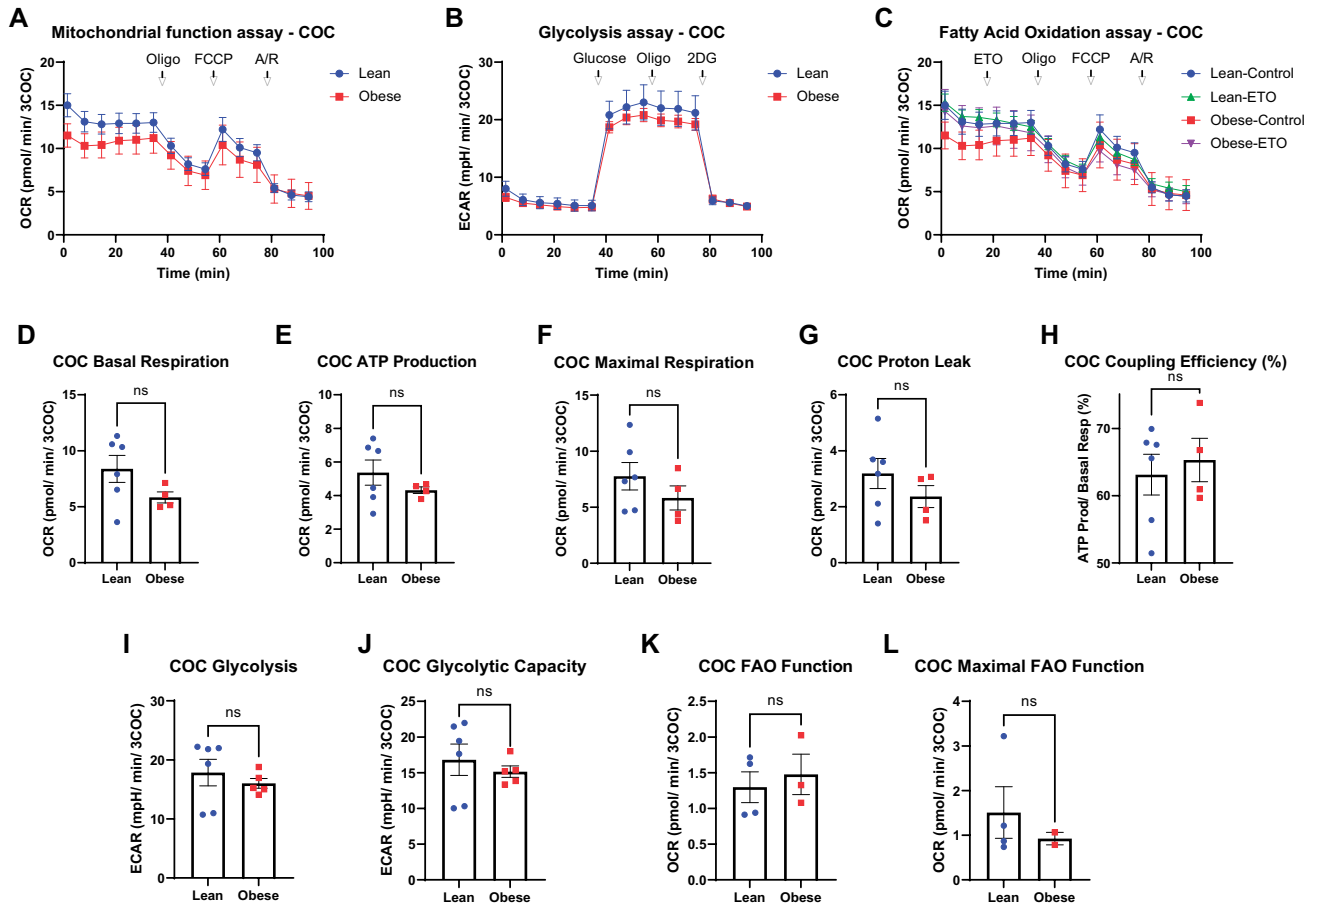

**Supplementary Figure S5.** No effects of obesity on aspects of mitochondrial respiration, glycolytic function, and fatty acid metabolism in mouse cumulus–oocyte complexes (COCs) at ovulation. COCs derived from lean or obese mice analyzed for (A) mitochondrial function; (B) glycolytic function; (C) fatty acid oxidation (FAO) function; (D) basal respiration; (E) ATP production inferred from oxygen consumption rate (OCR); (F) maximal respiration; (G) proton leak; (H) coupling efficiency (%); (I) glycolysis; (J) glycolytic capacity; (K) FAO function; (L) maximal FAO function. Three COCs were measured in each well. Data analyzed using unpaired two-tailed t-tests: ns  $P > 0.05$ .
