# Supplementary material for: Granulosa cell metabolism at ovulation correlates with oocyte competence and is disrupted by obesity and aging
Source: PubMed Central journal article supplement — Hum Reprod. 2024 Jul 16;39(9):2053–66. doi: 10.1093/humrep/deae154 (PMC11373349; doi:10.1093/humrep/deae154), 2024-07-16
Supplement: deae154_supplementary_figure_s6.pdf [file deae154_supplementary_figure_s6.pdf]

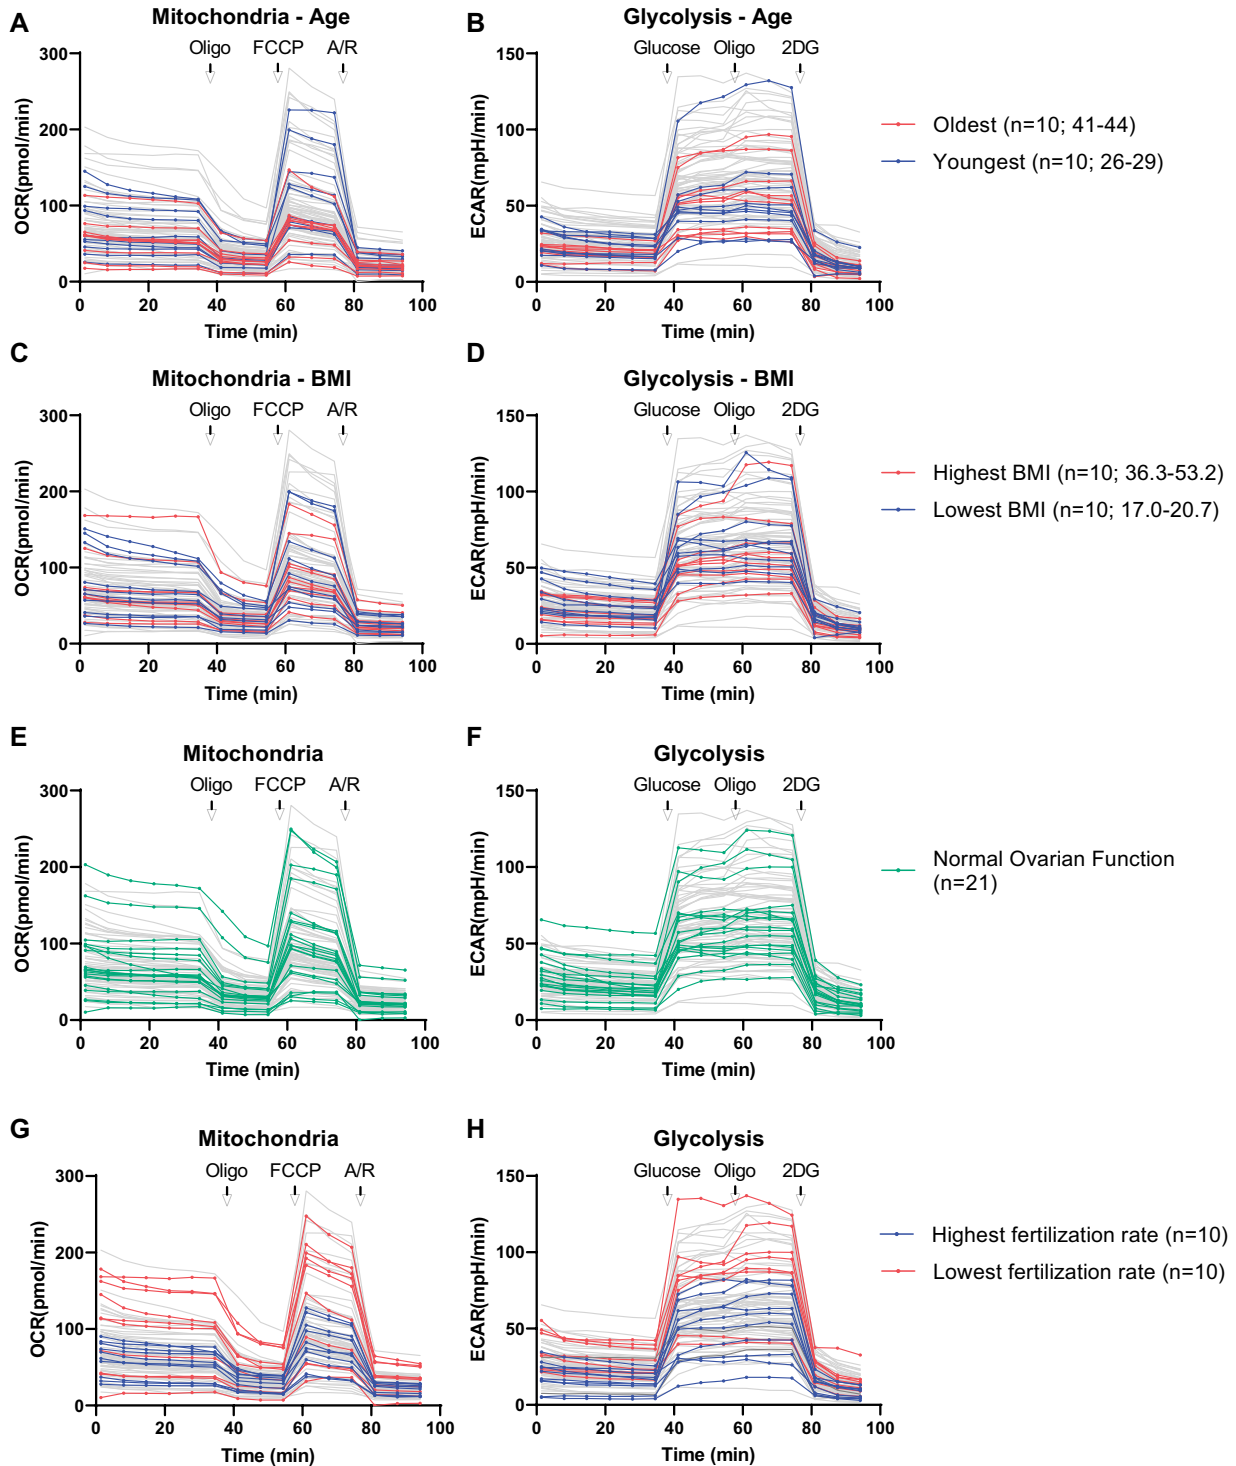

**Supplementary Figure S6. Mitochondrial and glycolytic function in all patients with specific patient groups illustrated in color.** (A) Mitochondrial function and (B) glycolytic function in the oldest (red) and youngest (blue) patients. (C) Mitochondrial and (D) glycolytic function in patients with highest (red) and lowest (blue) BMI. (E) Mitochondrial and (F) glycolytic function in patients with expected normal ovarian function (green). (G) Mitochondrial and (H) glycolytic function in patients with highest (blue) and lowest (red) fertilization rates. n = 10 for each group of patients, except for those with normal ovarian function (n = 21).
