# Supplementary material for: Granulosa cell metabolism at ovulation correlates with oocyte competence and is disrupted by obesity and aging
Source: PubMed Central journal article supplement — Hum Reprod. 2024 Jul 16;39(9):2053–66. doi: 10.1093/humrep/deae154 (PMC11373349; doi:10.1093/humrep/deae154), 2024-07-16
Supplement: deae154_supplementary_table_s1.pdf [file deae154_supplementary_table_s1.pdf]

Supplementary Table S1. Characteristics of patient cohort.

| Characteristic       | Total n = 85 |           | Normal ovarian function n = 21               |           | Ovarian infertility n = 64                |           |
|----------------------|--------------|-----------|----------------------------------------------|-----------|-------------------------------------------|-----------|
|                      | Mean (SD)    | Min–max   | Mean (SD)                                    | Min–max   | Mean (SD)                                 | Min–max   |
| Age                  | 35.5 (±4.6)  | 26–44     | 34.1 (±3.6)                                  | 27–40     | 36.0 (±4.7)                               | 26–44     |
| BMI                  | 27.4 (±4.6)  | 17.0–53.2 | 26.3 (±5.7)                                  | 21.2–32.1 | 27.8 (±6.9)                               | 17.0–53.2 |
| Cause of infertility | N            |           | Non-ovarian factor tubal factor, male factor |           | Ovarian factor endometriosis, unexplained |           |
| Tubal                | 6            |           | 5                                            |           | 1                                         |           |
| Endometriosis        | 8            |           | 0                                            |           | 8                                         |           |
| Other female         | 36           |           | 5                                            |           | 31                                        |           |
| Male factor          | 31           |           | 14                                           |           | 17                                        |           |
| PCOS                 | 17           |           | 0                                            |           | 17                                        |           |
| Unexplained          | 20           |           | 0                                            |           | 20                                        |           |
| Outcomes             | Mean         | Min–max   |                                              |           |                                           |           |
| Number of oocytes    | 12.82 (±8.5) | 1–48      |                                              |           |                                           |           |
| Total FSH dose (IU)  | 2789 (±1138) | 1050–5950 |                                              |           |                                           |           |
