# Supplementary material for: Granulosa cell metabolism at ovulation correlates with oocyte competence and is disrupted by obesity and aging
Source: PubMed Central journal article supplement — Hum Reprod. 2024 Jul 16;39(9):2053–66. doi: 10.1093/humrep/deae154 (PMC11373349; doi:10.1093/humrep/deae154), 2024-07-16
Supplement: deae154_supplementary_table_s2.pdf [file deae154_supplementary_table_s2.pdf]

Supplementary Table S2. Correlation of age and BMI with energy metabolism (n = 85).

| Metabolic parameters          | All patients (n = 85) |                | Normal ovarian function (n = 21) |        | Ovarian infertility (n = 64) |                |
|-------------------------------|-----------------------|----------------|----------------------------------|--------|------------------------------|----------------|
|                               | Age                   | BMI            | Age                              | BMI    | Age                          | BMI            |
| <b>FAO function</b>           |                       |                |                                  |        |                              |                |
| FAO function                  | -0.091                | <b>-0.270*</b> | 0.161                            | -0.325 | -0.157                       | -0.243         |
| Maximal FAO function          | -0.086                | 0.173          | 0.190                            | 0.468  | -0.161                       | 0.094          |
| FAO for ATP production        | -0.025                | -0.003         | 0.370                            | 0.255  | -0.094                       | -0.078         |
| <b>Glycolytic function</b>    |                       |                |                                  |        |                              |                |
| Glycolysis                    | 0.085                 | -0.114         | 0.406                            | -0.158 | 0.026                        | -0.108         |
| Glycolytic capacity           | 0.075                 | -0.091         | 0.391                            | -0.086 | 0.019                        | -0.082         |
| Glycolytic reserve            | -0.015                | -0.028         | -0.008                           | 0.170  | -0.037                       | -0.055         |
| Glycolytic reserve (%)        | 0.001                 | 0.016          | -0.039                           | 0.113  | -0.006                       | 0.001          |
| <b>Mitochondrial function</b> |                       |                |                                  |        |                              |                |
| Basal respiration             | -0.112                | -0.142         | 0.152                            | 0.073  | -0.164                       | -0.182         |
| ATP production                | -0.176                | -0.090         | -0.010                           | 0.082  | -0.217                       | -0.126         |
| Maximal respiration           | <b>-0.302**</b>       | -0.026         | -0.079                           | 0.099  | <b>-0.344**</b>              | -0.042         |
| Spare respiratory capacity    | <b>-0.357**</b>       | 0.039          | -0.153                           | 0.105  | <b>-0.377**</b>              | 0.039          |
| Proton leak                   | 0.030                 | <b>-0.222*</b> | 0.348                            | 0.040  | -0.065                       | <b>-0.261*</b> |
| Coupling efficiency (%)       | <b>-0.353**</b>       | <b>0.264*</b>  | <b>-0.452*</b>                   | 0.278  | <b>-0.336**</b>              | 0.239          |
| <b>ATP production rate</b>    |                       |                |                                  |        |                              |                |
| Total ATP production          | -0.012                | -0.189         | 0.318                            | 0.029  | -0.132                       | -0.239         |
| Mitochondrial ATP (%)         | <b>-0.265*</b>        | -0.078         | -0.168                           | -0.231 | <b>-0.253*</b>               | -0.005         |
| Glycolytic ATP (%)            | <b>0.265*</b>         | 0.078          | 0.168                            | 0.231  | <b>0.253*</b>                | 0.005          |

Boxed area also shown as Table 1.

Bold numbers indicate significant correlations.

\* P < 0.05. \*\* P < 0.01.
