# Supplementary material for: Granulosa cell metabolism at ovulation correlates with oocyte competence and is disrupted by obesity and aging
Source: PubMed Central journal article supplement — Hum Reprod. 2024 Jul 16;39(9):2053–66. doi: 10.1093/humrep/deae154 (PMC11373349; doi:10.1093/humrep/deae154), 2024-07-16
Supplement: deae154_supplementary_table_s3.pdf [file deae154_supplementary_table_s3.pdf]

**Supplementary Table S3.** Correlation of age and BMI with embryonic development in patients with normal or abnormal ovarian function.

| Clinical parameters         | All patients (n = 85) |        | Normal ovarian function (n = 21) |        | Ovarian infertility (n = 64) |        |
|-----------------------------|-----------------------|--------|----------------------------------|--------|------------------------------|--------|
|                             | Age                   | BMI    | Age                              | BMI    | Age                          | BMI    |
| Number of eggs              | <b>−0.375***</b>      | −0.175 | −0.271                           | 0.069  | <b>−0.404***</b>             | −0.199 |
| Fertilization rate (%)      | −0.018                | 0.036  | −0.008                           | −0.050 | −0.051                       | 0.019  |
| IVF fertilization rate (%)  | 0.116                 | 0.223  | –                                | –      | 0.111                        | 0.186  |
| ICSI fertilization rate (%) | −0.081                | 0.003  | 0.045                            | −0.143 | −0.155                       | 0.007  |
| On time day 3 (%)           | 0.038                 | −0.080 | 0.013                            | 0.103  | 0.077                        | −0.105 |
| Blastocyst rate (%)         | −0.207                | 0.031  | −0.028                           | −0.053 | −0.205                       | 0.034  |

Bold numbers indicate significant correlations.

\*\*\* P < 0.001.
