# Supplementary material for: Granulosa cell metabolism at ovulation correlates with oocyte competence and is disrupted by obesity and aging
Source: PubMed Central journal article supplement — Hum Reprod. 2024 Jul 16;39(9):2053–66. doi: 10.1093/humrep/deae154 (PMC11373349; doi:10.1093/humrep/deae154), 2024-07-16
Supplement: deae154_supplementary_table_s4.pdf [file deae154_supplementary_table_s4.pdf]

Supplementary Table S4. Energy metabolism and embryonic development (n = 85).

| Metabolic parameter        | Number of eggs | Fertilization rate (%) | IVF fertilization rate (%) | ICSI fertilization rate (%) | On time day 3 (%) | Blasts (%)      |
|----------------------------|----------------|------------------------|----------------------------|-----------------------------|-------------------|-----------------|
| FAO function               |                |                        |                            |                             |                   |                 |
| FAO function               | 0.070          | <b>-0.243*</b>         | -0.213                     | -0.240                      | -0.001            | -0.105          |
| Maximal FAO function       | 0.087          | -0.146                 | -0.050                     | -0.201                      | 0.138             | 0.057           |
| FAO for ATP production     | 0.090          | <b>-0.248*</b>         | -0.053                     | <b>-0.315*</b>              | 0.071             | -0.070          |
| Glycolytic function        |                |                        |                            |                             |                   |                 |
| Glycolysis                 | -0.033         | <b>-0.281*</b>         | -0.234                     | <b>-0.343**</b>             | -0.071            | -0.168          |
| Glycolytic capacity        | -0.042         | <b>-0.255*</b>         | -0.187                     | <b>-0.329**</b>             | -0.039            | -0.164          |
| Glycolytic reserve         | 0.037          | -0.109                 | 0.160                      | -0.148                      | 0.230             | -0.075          |
| Glycolytic reserve (%)     | 0.006          | 0.027                  | 0.256                      | -0.023                      | <b>0.288*</b>     | 0.001           |
| Mitochondrial function     |                |                        |                            |                             |                   |                 |
| Basal respiration          | -0.036         | <b>-0.240*</b>         | -0.197                     | <b>-0.275*</b>              | 0.169             | 0.122           |
| ATP production             | 0.026          | <b>-0.227*</b>         | -0.124                     | <b>-0.258*</b>              | 0.208             | 0.161           |
| Maximal respiration        | 0.134          | -0.177                 | -0.040                     | -0.191                      | 0.212             | 0.177           |
| Spare respiratory capacity | <b>0.222*</b>  | -0.098                 | -0.015                     | -0.090                      | 0.185             | 0.165           |
| Proton leak                | -0.094         | <b>-0.269*</b>         | -0.261                     | <b>-0.293*</b>              | 0.165             | 0.054           |
| Coupling efficiency (%)    | 0.120          | 0.184                  | 0.157                      | 0.202                       | -0.019            | 0.094           |
| ATP production rate        |                |                        |                            |                             |                   |                 |
| Total ATP production       | 0.032          | <b>-0.281*</b>         | -0.269                     | <b>-0.269*</b>              | 0.002             | -0.031          |
| Mitochondrial ATP (%)      | 0.015          | -0.091                 | 0.036                      | -0.122                      | 0.130             | <b>0.340**</b>  |
| Glycolytic ATP (%)         | -0.015         | 0.091                  | -0.036                     | 0.122                       | -0.130            | <b>-0.340**</b> |

Bold numbers indicate significant correlations.

\* P < 0.05.

\*\* P < 0.01.
